# Supplementary material for: A new perspective: deciphering the aberrance and clinical implication of disulfidptosis signatures in clear cell renal cell carcinoma
Source: publisher site journal article supplement (doi:10.18632/aging.205916), 2024-06-10
Supplement: Supplementary file [file aging-v16i11-205916-supplementary-material-SD1.pdf]

## SUPPLEMENTARY FIGURES

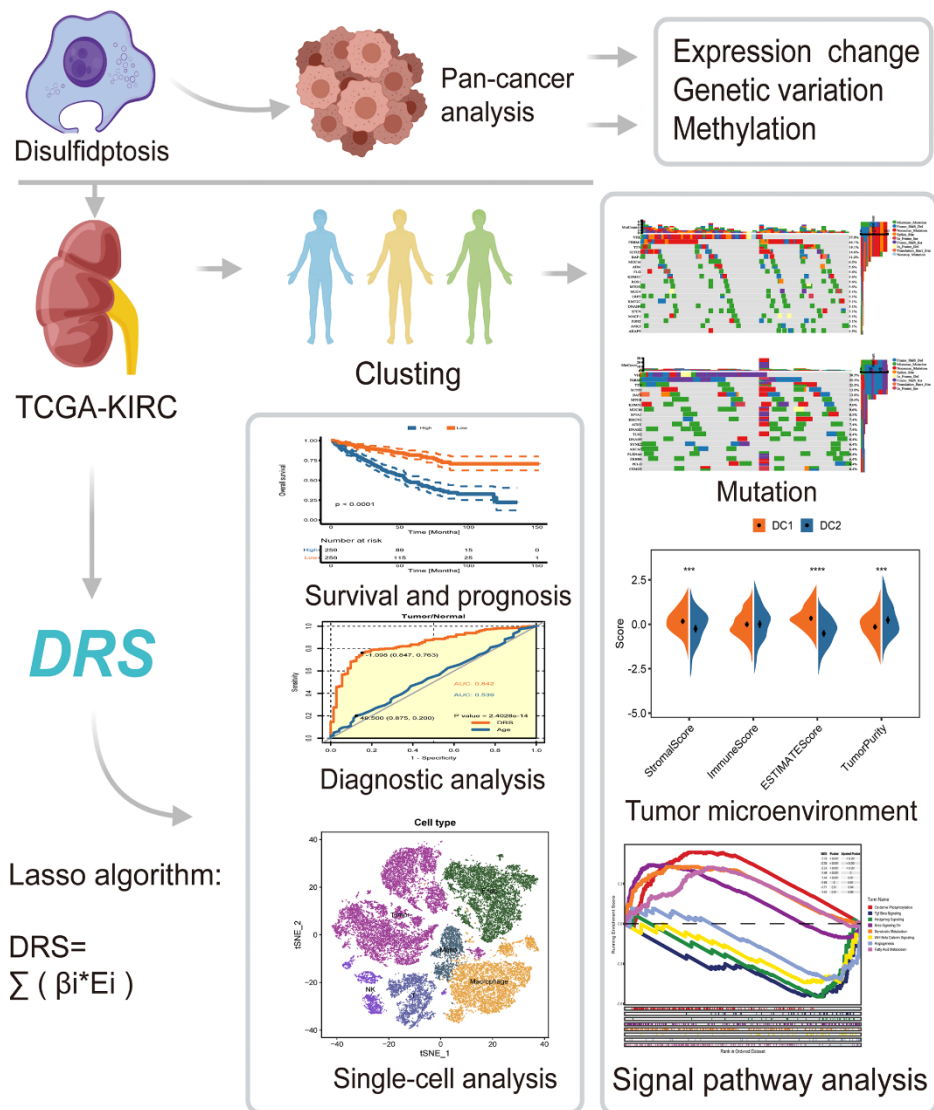

Supplementary Figure 1. Workflow of our research.

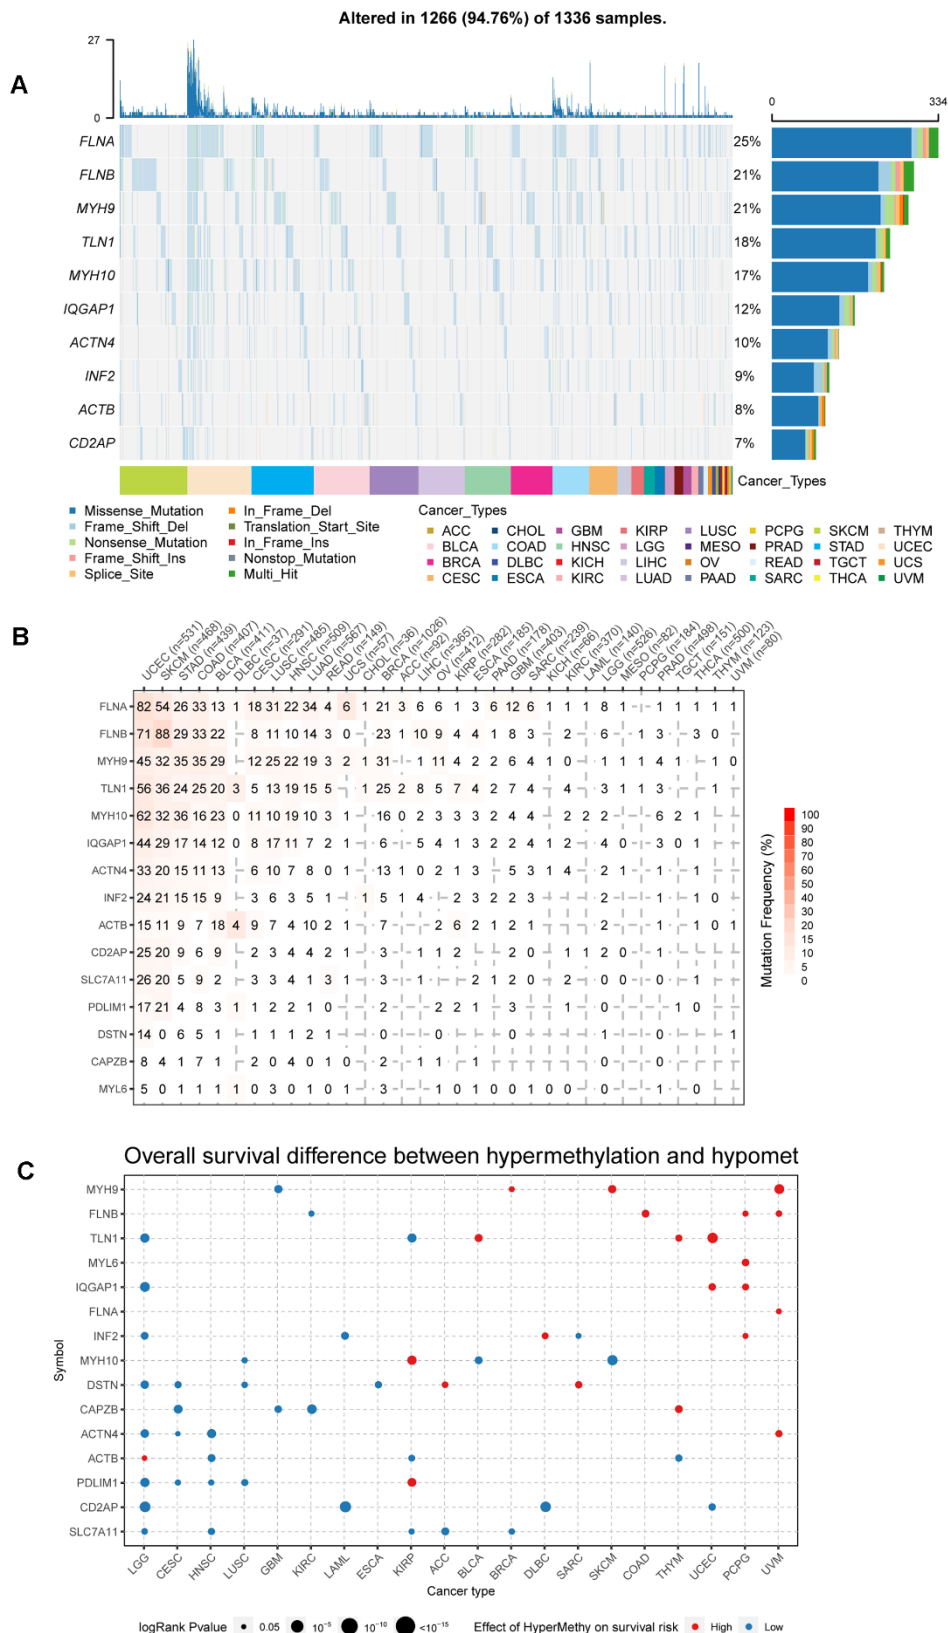

**Supplementary Figure 2. Landscape of mutation and methylation of 15 disulfide-related molecules.** (A) Waterfall diagram showing the mutation types of disulfidation-related genes in multiple cancers. (B) Heatmap showing the mutation frequency of 15 disulfide-related molecules in pan-cancer. (C) Bubble chart showing the correlation between methylation of 15 disulfide-related molecules and overall survival.

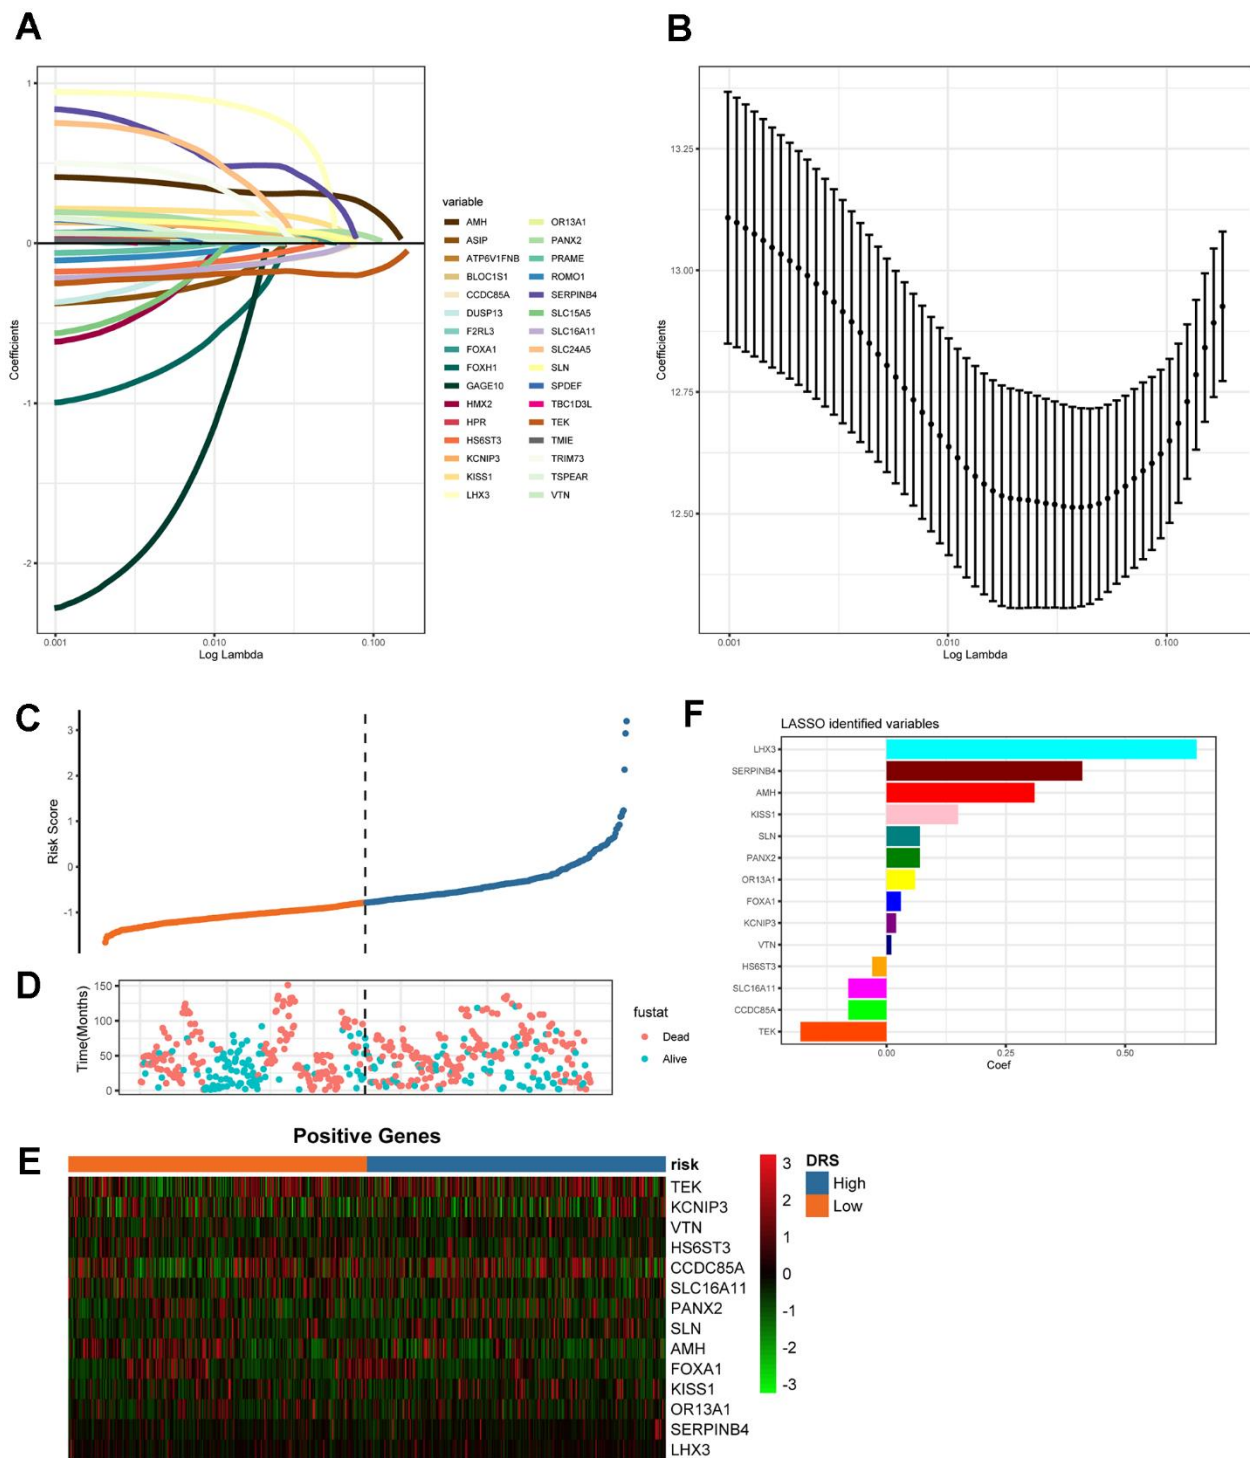

**Supplementary Figure 3. Establishment of DRS by LASSO regression analysis.** (A) LASSO coefficient profiles of the 32 DEGs in ccRCC. (B) Tenfold cross-validation LASSO regression analysis to estimate the optimal LASSO regularization parameter. (C, D) DRS distribution, survival status, and survival time of patients with ccRCC in the TCGA-KIRC dataset. (E) Heatmap of the mRNA expression of 14 DRS model-related genes in patients with ccRCC from TCGA-KIRC (n = 518) dataset. (F) Coefficients for 14 modeled genes.

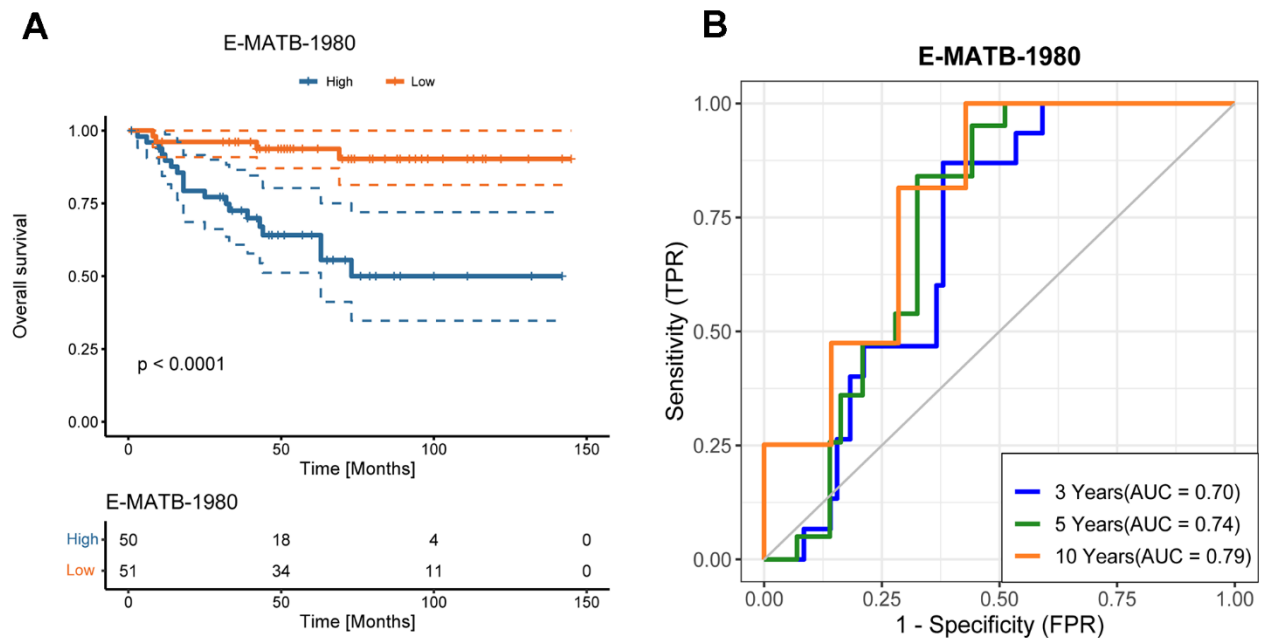

**Supplementary Figure 4. Verify the prognostic value of DRS in the E-MATB-1980 cohort. (A)** Survival analysis for overall survival of the two DRS groups in the E-MATB-1980 cohort. **(B)** Time-dependent ROC analysis of the predictive value of the DRS in the overall survival of patients at 1, 3, 5, and 10 years based on the E-MATB-1980 cohort.

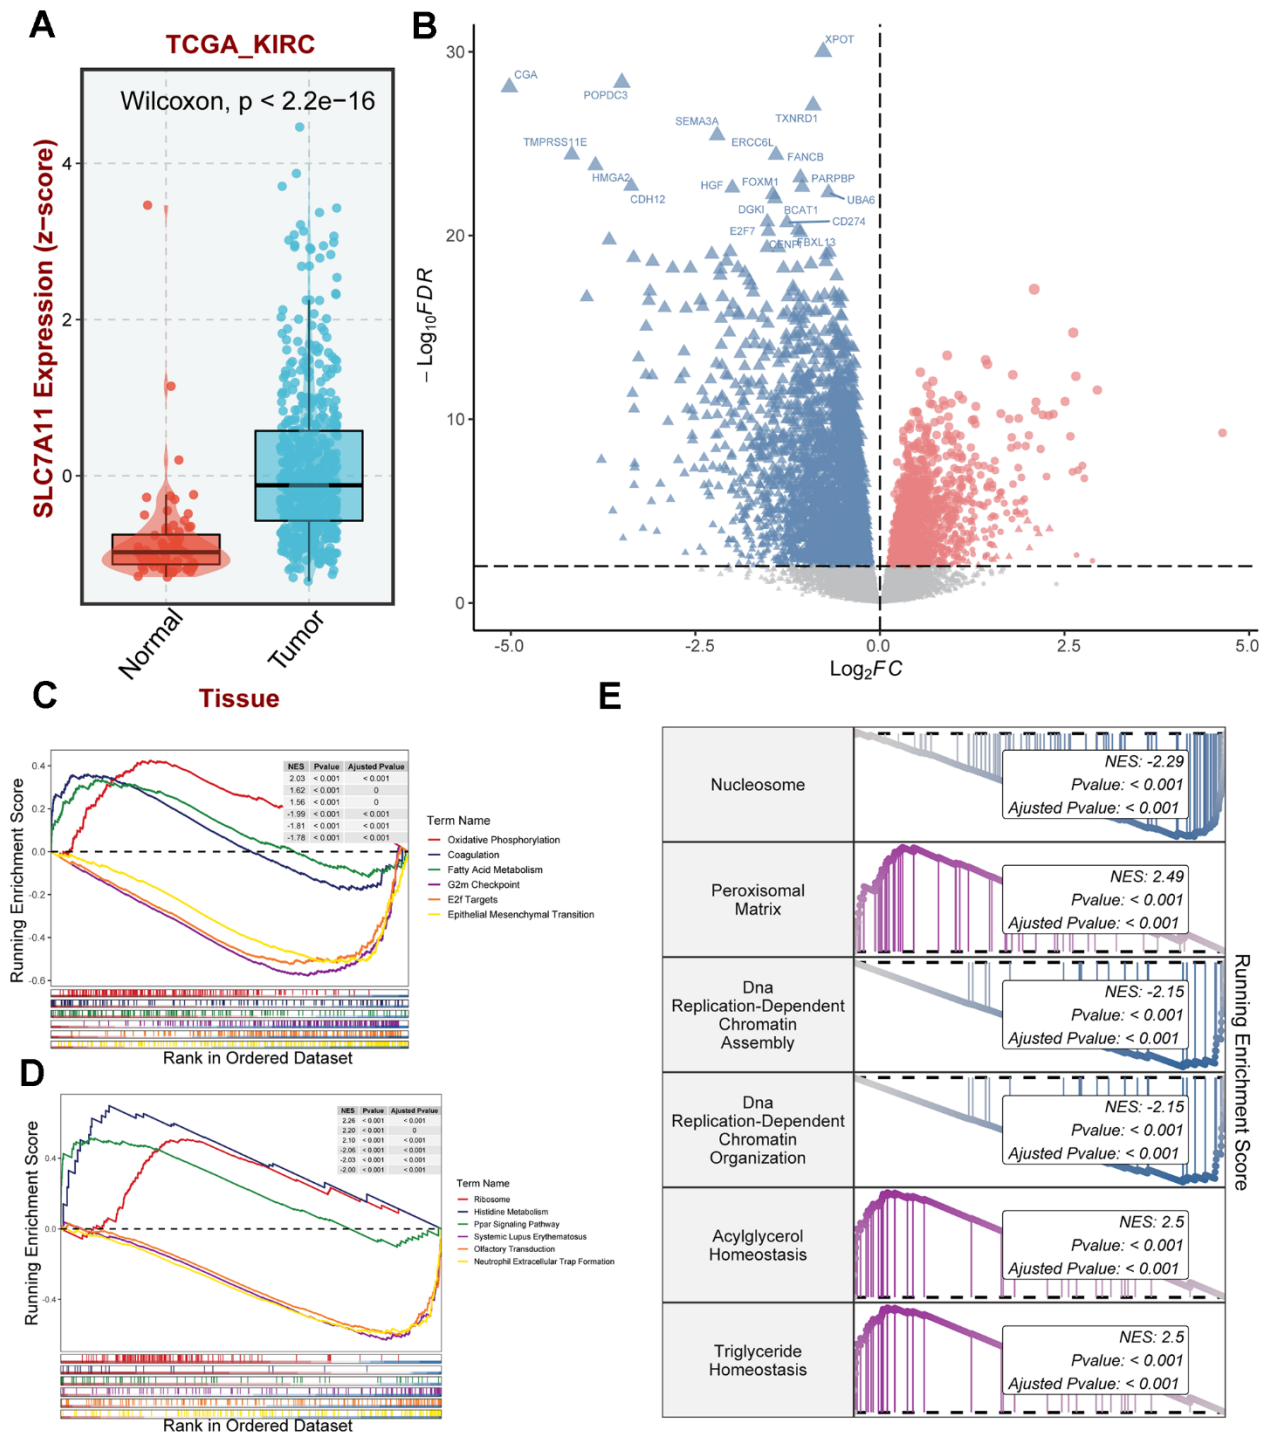

**Supplementary Figure 5. Functional enrichment indicates that SLC7A11 is potentially associated with EMT and the TME in ccRCC.** (A) The box plot compares the expression levels of the SLC7A11 gene between tumor and normal tissues. (B) Volcano plot of SLC7A11-related DEGs in ccRCC. Red and blue points indicate the upregulated and downregulated genes, respectively. (C) GSEA Hallmark analysis. (D) GSEA KEGG analysis. (E) GSEA GO analysis.
