# Supplementary material for: A new perspective: deciphering the aberrance and clinical implication of disulfidptosis signatures in clear cell renal cell carcinoma
Source: publisher site journal article supplement (doi:10.18632/aging.205916), 2024-06-10
Supplement: Supplementary file [file aging-v16i11-205916-supplementary-material-SD2.pdf]

## SUPPLEMENTARY TABLE

**Supplementary Table 1. Variances in gene mutation frequencies between DC1 and DC2 groups.**

| <b>Hugo_symbol</b> | <b>Group1</b> | <b>Group2</b> | <b>n_mutated_group1</b> | <b>n_mutated_group2</b> | <b>p_value</b> |
|--------------------|---------------|---------------|-------------------------|-------------------------|----------------|
| PBRM1              | Cluster1      | Cluster2      | 83 of 228               | 63 of 128               | 0.024531121    |
| PBRM1              | Cluster2      | Cluster1      | 63 of 128               | 83 of 228               | 0.024531121    |
| BAP1               | Cluster1      | Cluster2      | 21 of 228               | 16 of 128               | 0.367009091    |
| BAP1               | Cluster2      | Cluster1      | 16 of 128               | 21 of 228               | 0.367009091    |
| TTN                | Cluster1      | Cluster2      | 34 of 228               | 24 of 128               | 0.371288981    |
| TTN                | Cluster2      | Cluster1      | 24 of 128               | 34 of 228               | 0.371288981    |
| VHL                | Cluster1      | Cluster2      | 108 of 228              | 58 of 128               | 0.740531199    |
| VHL                | Cluster2      | Cluster1      | 58 of 128               | 108 of 228              | 0.740531199    |
| MUC16              | Cluster1      | Cluster2      | 17 of 228               | 9 of 128                | 1              |
| MUC16              | Cluster2      | Cluster1      | 9 of 128                | 17 of 228               | 1              |
